# Supplementary material for: [Et3NH][HSO4]-catalyzed eco-friendly and expeditious synthesis of thiazolidine and oxazolidine derivatives
Source: Royal Society of Chemistry journal article supplement (doi:10.1039/c4ra15590d), 2015-01-01
Supplement: c4ra15590d1.pdf [file c4ra15590d1.pdf]

**Supplementary Information**

**[Et<sub>3</sub>NH][HSO<sub>4</sub>]-catalyzed eco-friendly and expeditious synthesis of thiazolidine and oxazolidine derivatives**

Ali Mohammed Malla,<sup>a</sup> Mehtab Parveen,<sup>\*a</sup> Faheem Ahmad,<sup>a</sup> Shaista Azaz,<sup>a</sup> Mahbbob Alam<sup>b</sup>

<sup>a</sup>*Division of Organic Synthesis, Aligarh Muslim University, Aligarh, 202002, India*

<sup>b</sup>*Division of Bioscience, Dongguk University, Gyeongju 780-714, Republic of Korea*

*\*Corresponding author: Mehtab Parveen*

*E-mail: mehtab.organic2009@gmail.com; Tel: +91-9897179498*

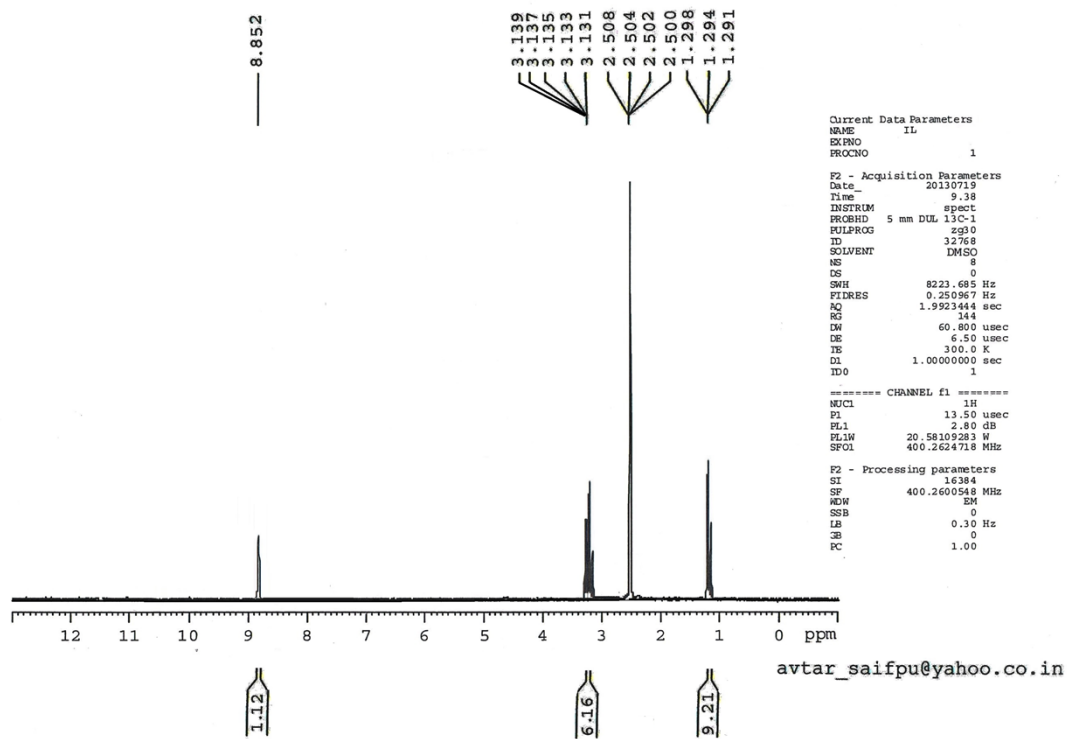

Fig. S1  $^1\text{H}$  NMR spectrum of ionic liquid  $[\text{Et}_3\text{NH}][\text{HSO}_4]$

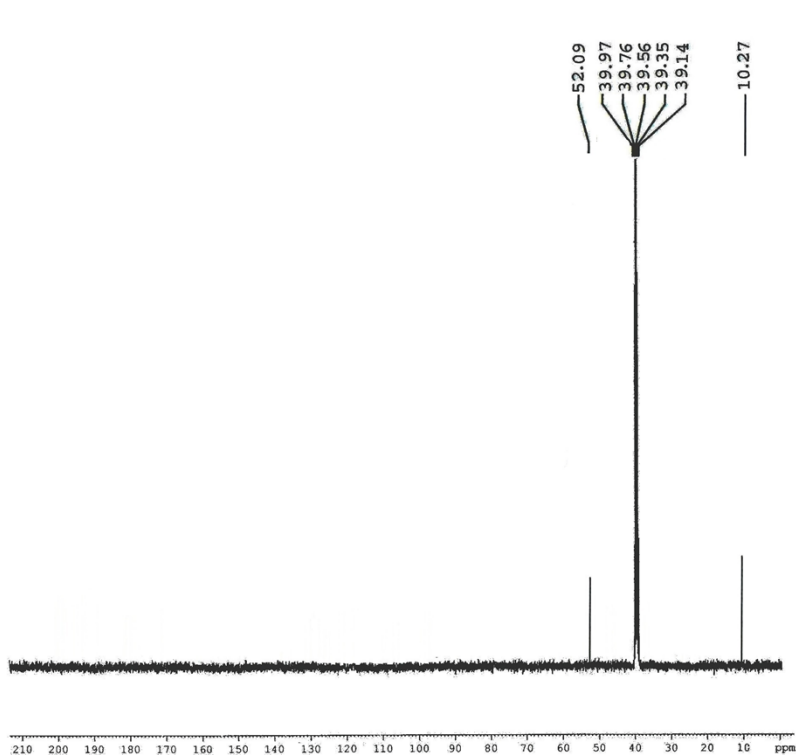

BRUKER  
 AVANCE II 00 NMR  
 Spectrometer  
 SAIF  
 Panjab University  
 Chandigarh

```

Current Data Parameters
NAME      IL
EXPNO     1
PROCNO    1

F2 - Acquisition Parameters
Date_     20130719
Time      10.54
INSTRUM   spect
PROBHD    5 mm F4BBO BB-
PULPROG   zgpg30
TD        65536
SOLVENT   DMSO
NS        400
DS        4
SWH        29761.04 Hz
FIDRES     0.454131 Hz
AQ         1.1010548 sec
RG         575
DW         16.800 usec
DE         6.00 usec
TE         296.3 K
D1         2.00000000 sec
d11        0.03000000 sec
DELTA     1.89999998 sec
TD0        1

===== CHANNEL f1 =====
NUC1       13C
P1         9.60 usec
PL1        -2.00 dB
SFO1       100.6228298 MHz

===== CHANNEL f2 =====
CPDPRG2   waltz16
NUC2       1H
PCPD2     80.00 usec
PL2        -3.00 dB
PL12       14.31 dB
PL13       18.00 dB
SFO2       400.1316005 MHz

F2 - Processing parameters
SI         32768
SF         100.6128193 MHz
WDW        EM
SSB        0
LB         1.00 Hz
GB         0
PC         1.40
  
```

avtar\_saifpu@yahoo.co.in

**Fig. S2**  $^{13}\text{C}$  NMR spectrum of ionic liquid  $[\text{Et}_3\text{NH}][\text{HSO}_4]$

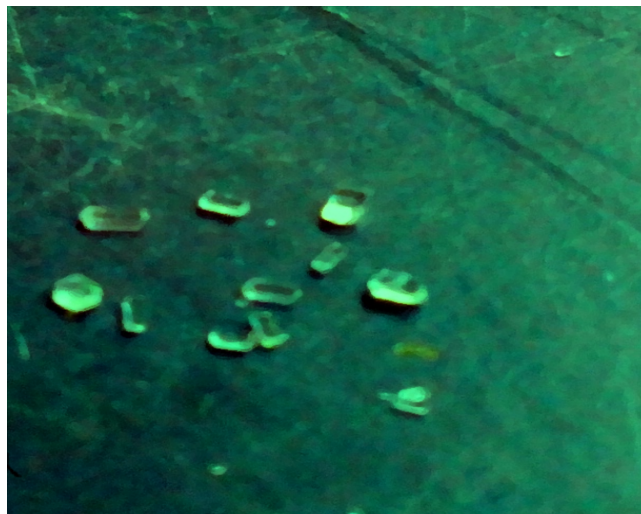

Fig. S3 Crystals of intermediate compound (5)

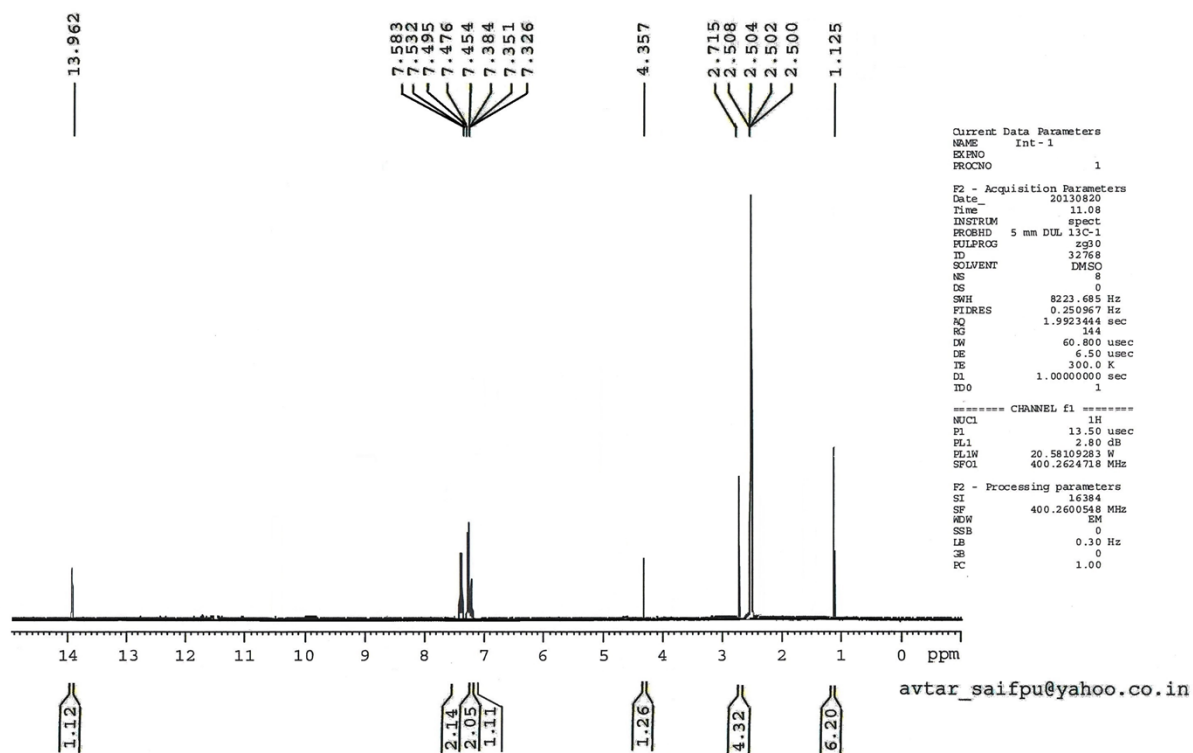

Fig. S4 <sup>1</sup>H NMR spectrum of intermediate compound (5)

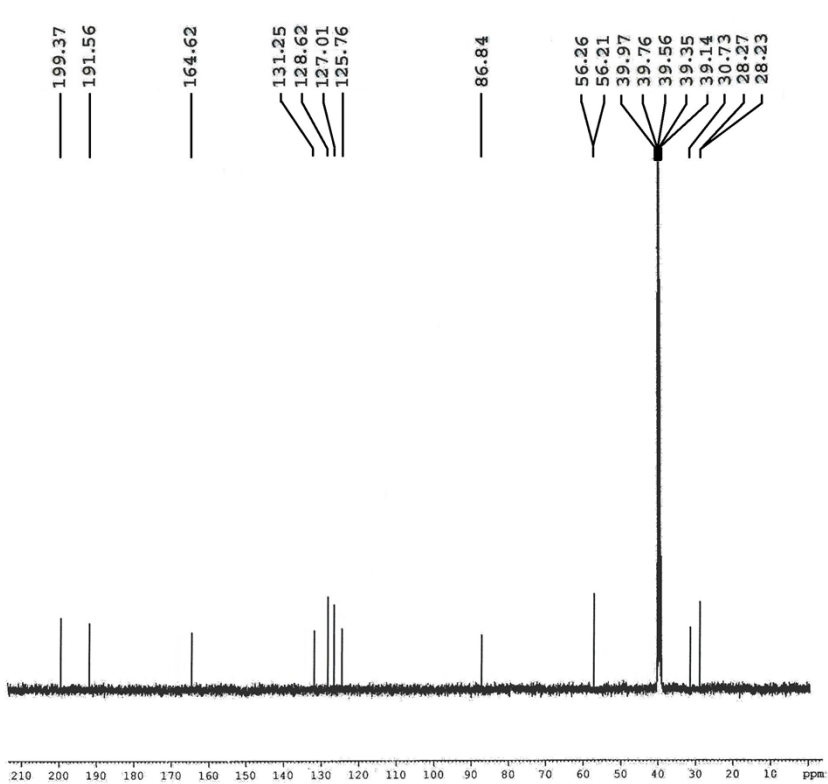

```

BRUKER
AVANCE II 00 NMR
Spectrometer
SAIF
Panjab University
Chandigarh

Current Data Parameters
NAME Int-1
EXPNO 1
PROCNO 1

F2 - Acquisition Parameters
Date_ 20130820
Time 11.34
INSTRUM spect
PROBHD 5 mm FAPBBO BB-
PULPROG zgpg30
TD 65536
SOLVENT DMSO
NS 400
DS 4
SWH 29761.904 Hz
FIDRES 0.454131 Hz
AQ 1.1010548 sec
RG 575
DW 16.800 usec
DE 6.00 usec
TE 296.3 K
D1 2.00000000 sec
d11 0.03000000 sec
DELTA 1.89999998 sec
TD0 1

===== CHANNEL f1 =====
NUC1 13C
P1 9.60 usec
PL1 -2.00 dB
SFO1 100.6228298 MHz

===== CHANNEL f2 =====
CPDPRG2 waltz16
NUC2 1H
PCPD2 80.00 usec
PL2 -3.00 dB
PL12 14.31 dB
PL13 18.00 dB
SFO2 400.1316005 MHz

F2 - Processing parameters
SI 32768
SF 100.6128193 MHz
WDW EM
SSB 0
LB 1.00 Hz
GB 0
PC 1.40

```

avtar\_saifpu@yahoo.co.in

Fig. S5 <sup>13</sup>C NMR spectrum of intermediate compound (5)

# <sup>1</sup>H NMR and <sup>13</sup>C spectrum of some selected Compounds

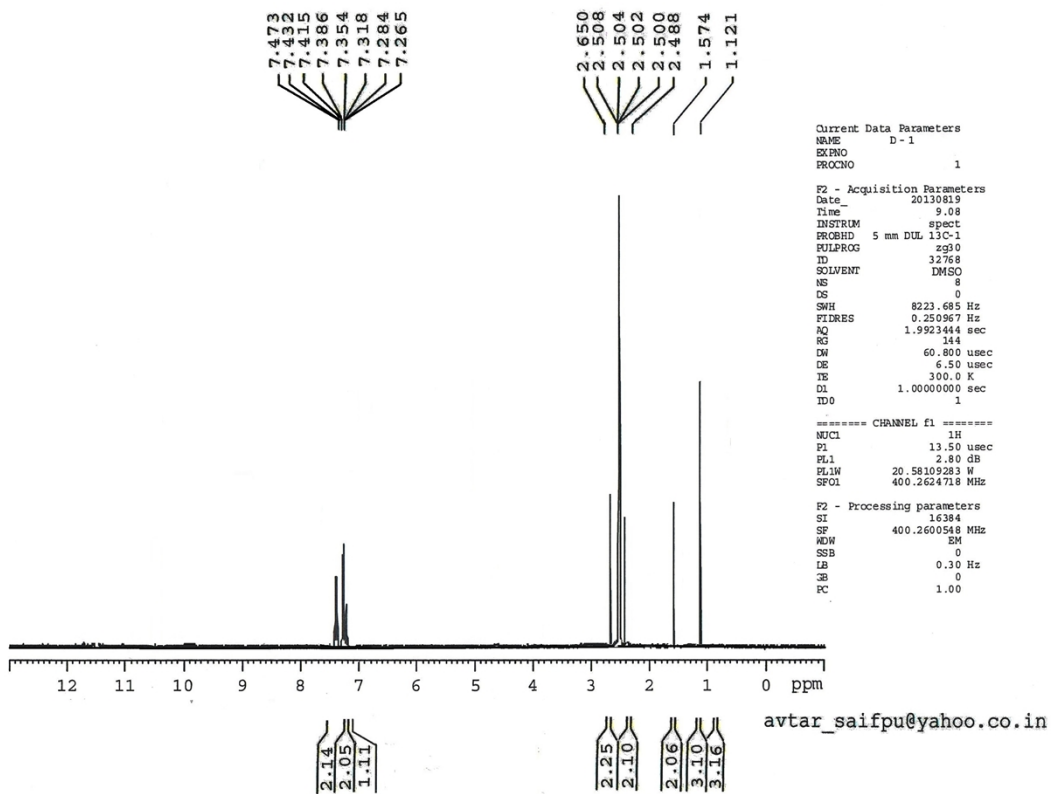

<sup>1</sup>H NMR spectrum of compound (4a)

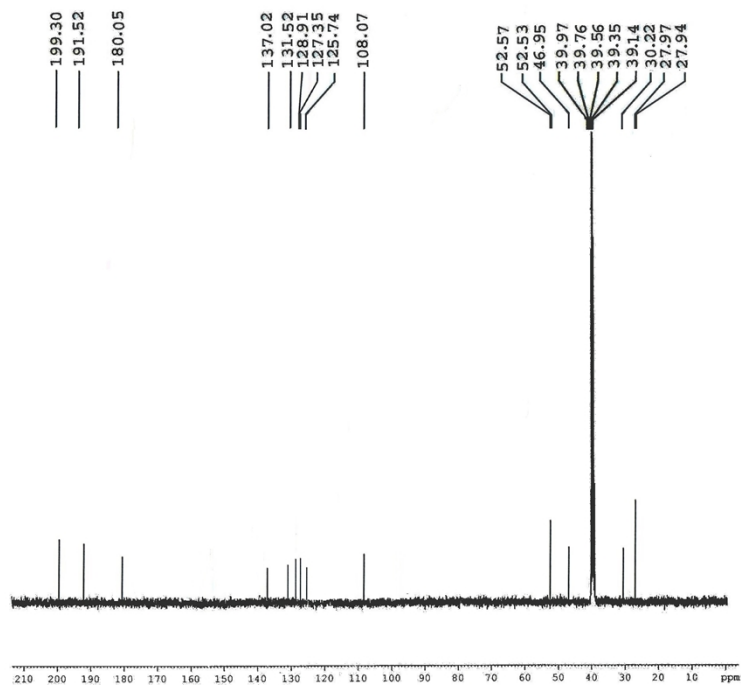

```

BRUKER
AVANCE II 00 NMR
Spectrometer
SAIF
Panjab University
Chandigarh

Current Data Parameters
NAME      D-1
EXPNO     1
PROCNO    1

F2 - Acquisition Parameters
Date_     20130613
Time      9.34
INSTRUM   spect
PROBHD    5 mm F4BBO BB-
PULPROG   zgpg30
TD         65536
SOLVENT   DMSO
NS         4
DS         4
SWH        29761.904 Hz
FIDRES     0.454131 Hz
AQ         1.1010348 sec
RG         575
DW         16.800 usec
DE         6.00 usec
TE         296.3 K
D1         2.0000000 sec
d11        0.0300000 sec
DELTA      1.8999999 sec
TD0        1

===== CHANNEL f1 =====
NUC1       13C
P1         9.60 usec
PL1        -2.00 dB
SFO1       100.6228298 MHz

===== CHANNEL f2 =====
CPDPRG2   waltz16
NUC2       1H
PCPD2     80.00 usec
PL2        -3.00 dB
PL12       14.31 dB
PL13       18.00 dB
SFO2       400.1316005 MHz

F2 - Processing parameters
SI         32768
SF         100.6128193 MHz
WDW        EM
SSB        0
LB         1.00 Hz
GB         0
PC         1.40
  
```

avtar\_saifpu@yahoo.co.in

<sup>13</sup>C NMR spectrum of compound (4a)

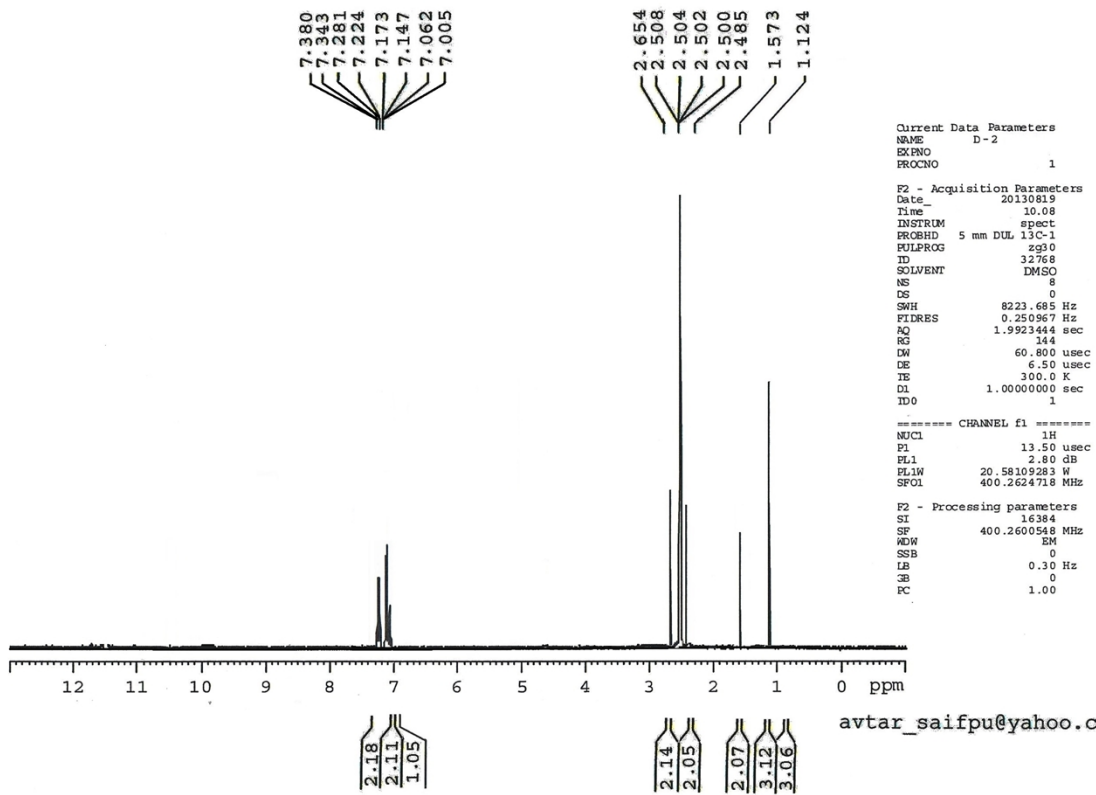

$^1\text{H}$  NMR spectrum of compound (4b)



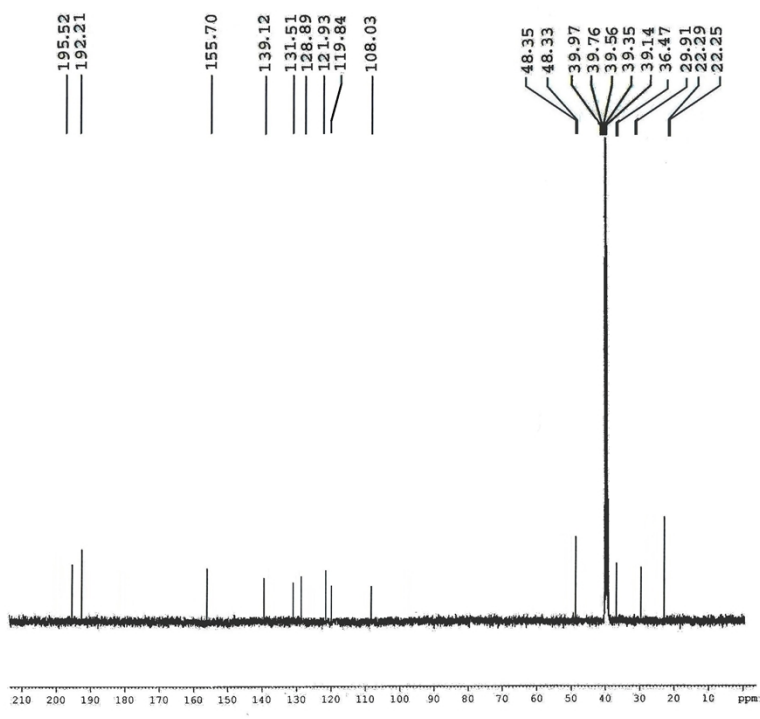

```

BRUKER
AVANCE II 00 NMR
Spectrometer
SAIF
Panjab University
Chandigarh

Current Data Parameters
NAME      D-2
EXPNO     1
PROCNO    1

F2 - Acquisition Parameters
Date      20130819
Time      10.34
INSTRUM   spect
PROBHD    5 mm F4BBO BB-
PULPROG   zgpg30
TD         65536
SOLVENT   DMSO
NS         400
DS         4
SWH        29761.904 Hz
FIDRES     0.454131 Hz
AQ         1.1010548 sec
RG         575
DW         16.800 usec
DE         6.00 usec
TE         296.3 K
D1         2.00000000 sec
d11        0.03000000 sec
DELTA     1.89999998 sec
TDO        1

----- CHANNEL f1 -----
NUC1       13C
P1         9.60 usec
PL1        -2.00 dB
SFO1       100.6228298 MHz

----- CHANNEL f2 -----
CPDPRG2   waltz16
NUC2       1H
PCPD2     80.00 usec
PL2        -3.00 dB
PL12       14.31 dB
PL13       18.00 dB
SFO2       400.1316005 MHz

F2 - Processing parameters
SI         32768
SF         100.6128193 MHz
WDW        EM
SSB        0
LB         1.00 Hz
GB         0
PC         1.40

```

avtar\_saifpu@yahoo.co.in

<sup>13</sup>C NMR spectrum of compound (4b)

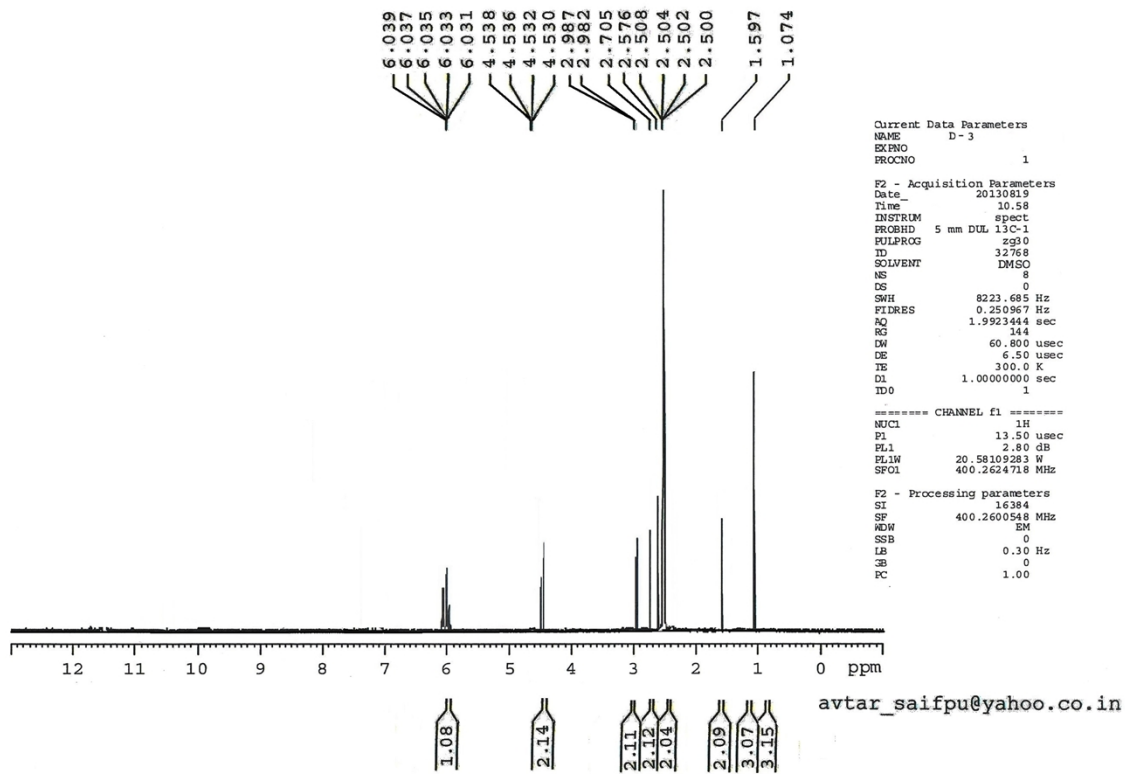

<sup>1</sup>H NMR spectrum of compound (4c)

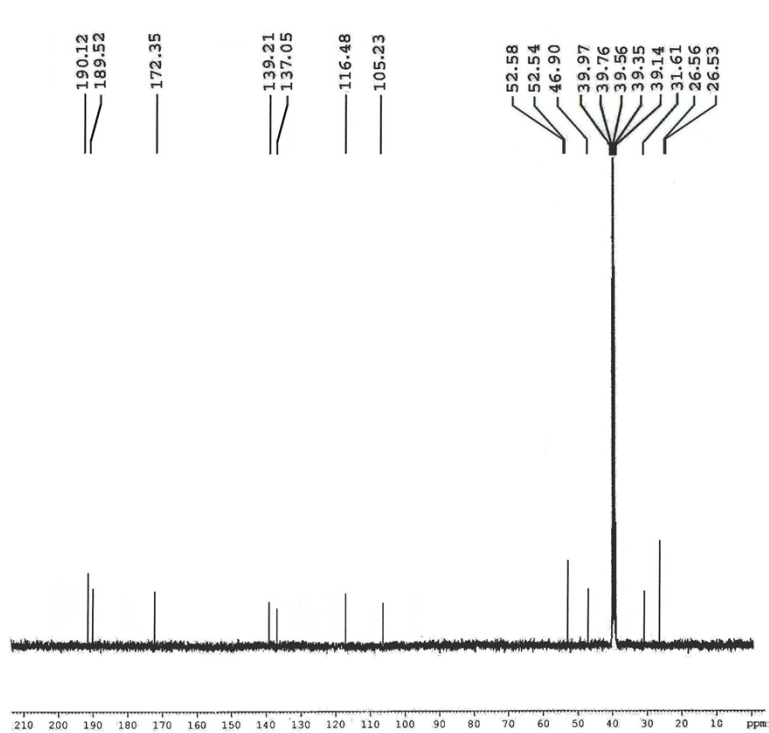

BRUKER  
 AVANCE II 00 NMR  
 Spectrometer  
 SAIF  
 Panjab University  
 Chandigarh

Current Data Parameters  
 NAME D-3  
 EXPNO 1  
 PROCNO 1

F2 - Acquisition Parameters  
 Date\_ 20130819  
 Time 11.24  
 INSTRUM spect  
 PROBHD 5 mm FAPBO BB-  
 PULPROG zgpg30  
 TD 65536  
 SOLVENT DMSO  
 NS 400  
 DS 4  
 SWH 29761.904 Hz  
 FIDRES 0.454131 Hz  
 AQ 1.1010548 sec  
 RG 575  
 DW 16.800 usec  
 DE 6.00 usec  
 TE 296.3 K  
 D1 2.0000000 sec  
 d11 0.0300000 sec  
 DELTA 1.89999998 sec  
 TD0 1

===== CHANNEL f1 =====  
 NUC1 13C  
 P1 9.60 usec  
 PL1 -2.00 dB  
 SFO1 100.6228298 MHz

===== CHANNEL f2 =====  
 CPDPRG2 waltz16  
 NUC2 1H  
 PCPD2 80.00 usec  
 PL2 -3.00 dB  
 PL12 14.31 dB  
 PL1 18.00 dB  
 SFO2 400.1316005 MHz

F2 - Processing parameters  
 SI 32768  
 SF 100.6128193 MHz  
 WDW EM  
 SSB 0  
 LB 1.00 Hz  
 GB 0  
 PC 1.40

avtar\_saifpu@yahoo.co.in

<sup>13</sup>C NMR spectrum of compound (4c)

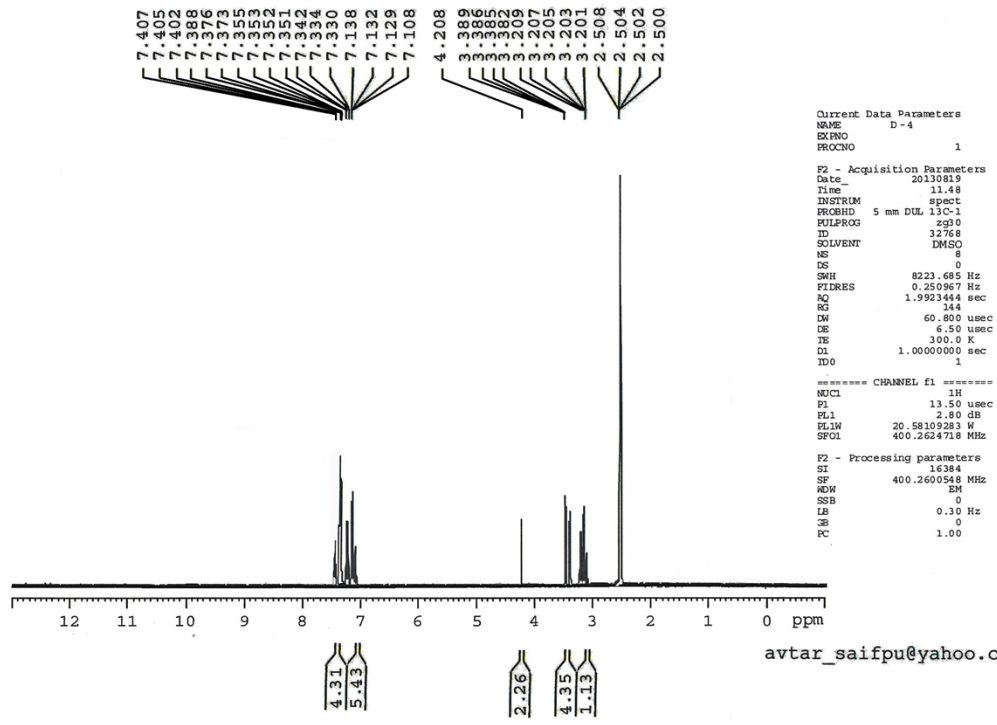

avtar\_saifpu@yahoo.co.in

<sup>1</sup>H NMR spectrum of compound (4d)

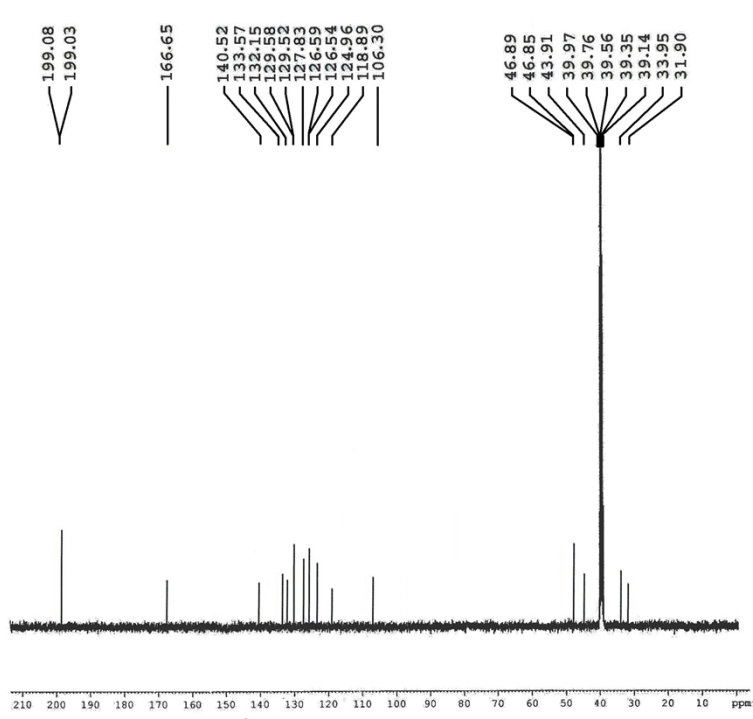

```

BRUKER
AVANCE II 00 NMR
Spectrometer
SAIF
Panjab University
Chandigarh

Current Data Parameters
NAME      D-4
EXPNO     1
PROCNO    1

F2 - Acquisition Parameters
Date_     20130819
Time      11:59
INSTRUM   spect
PROBHD    5 mm F4BBO BB-
PULPROG   zgpg30
TD         65536
SOLVENT   DMSO
NS         400
DS         4
SWH        29761.904 Hz
FIDRES     0.454131 Hz
AQ         1.1010548 sec
RG         375
DW         16.800 usec
DE         6.00 usec
TE         296.3 K
D1         2.0000000 sec
d11        0.0300000 sec
DELTA     1.89999998 sec
TDO        1

===== CHANNEL f1 =====
NUC1       13C
P1         9.60 usec
PL1        -2.00 dB
SFO1       100.6228298 MHz

===== CHANNEL f2 =====
CPDPRG2    waltz16
NUC2       1H
PCPD2      80.00 usec
PL2        -3.00 dB
PL12       14.31 dB
PL13       19.00 dB
SFO2       400.1316005 MHz

F2 - Processing parameters
SI         32768
SF         100.6128193 MHz
WDW        EM
SSB        0
LB         1.00 Hz
GB         0
PC         1.40

```

avtar\_saifpu@yahoo.co.in

<sup>13</sup>C NMR spectrum of compound (4d)

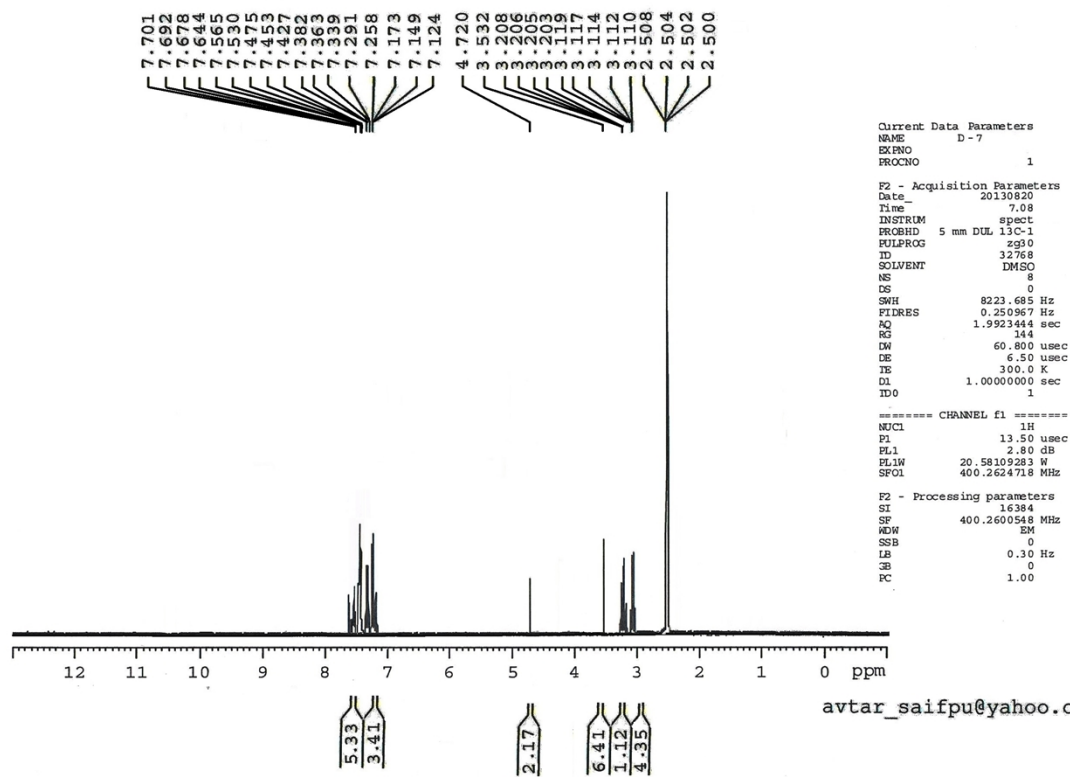

avtar\_saifpu@yahoo.co.in

<sup>1</sup>H NMR spectrum of compound (4g)

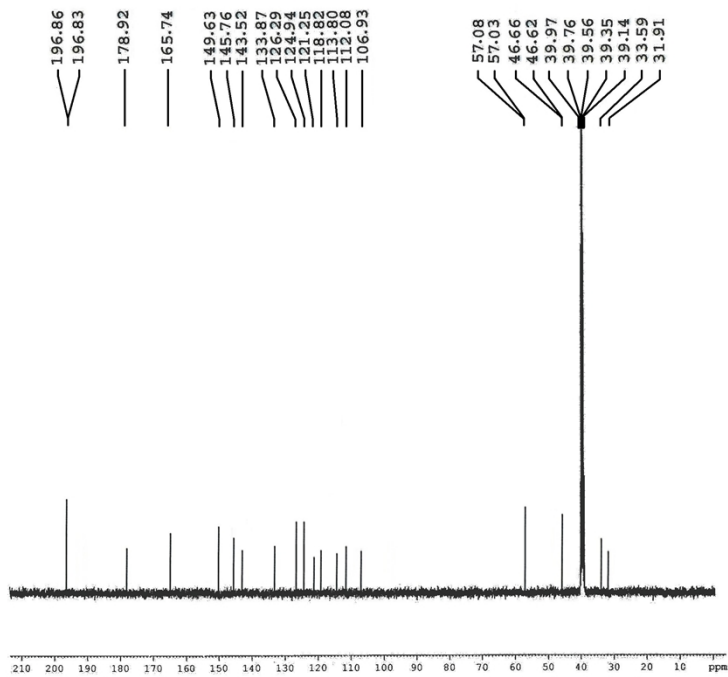

```

BRUKER
AVANCE II 00 NMR
Spectrometer
SAIF
Panjab University
Chandigarh

Current Data Parameters
NAME      D-7
EXPNO     1
PROCNO    1

F2 - Acquisition Parameters
Date_     20130820
Time      7.24
INSTRUM   spect
PROBHD    5 mm F4BBO BB-
PULPROG   zgpg30
TD         65536
SOLVENT   DMSO
NS         400
DS         4
SWH        29761.904 Hz
FIDRES     0.454131 Hz
AQ         1.1010548 sec
RG         575
DW         16.800 usec
DE         6.00 usec
TE         296.3 K
D1         2.00000000 sec
d11        0.03000000 sec
DELTA     1.89999998 sec
TD0        1

----- CHANNEL f1 -----
NUC1       13C
P1         9.60 usec
PL1        -2.00 dB
SFO1       100.6228298 MHz

----- CHANNEL f2 -----
CPDPRG2   waltz16
NUC2       1H
PCPD2     80.00 usec
PL2        -3.00 dB
PL12       14.31 dB
PL13       18.00 dB
SFO2       400.1316005 MHz

F2 - Processing parameters
SI         32768
SF         100.6128193 MHz
WDW        EM
SSB        0
LB         1.00 Hz
GB         0
PC         1.40
  
```

avtar\_saiipu@yahoo.co.in

<sup>13</sup>C NMR spectrum of compound (4g)

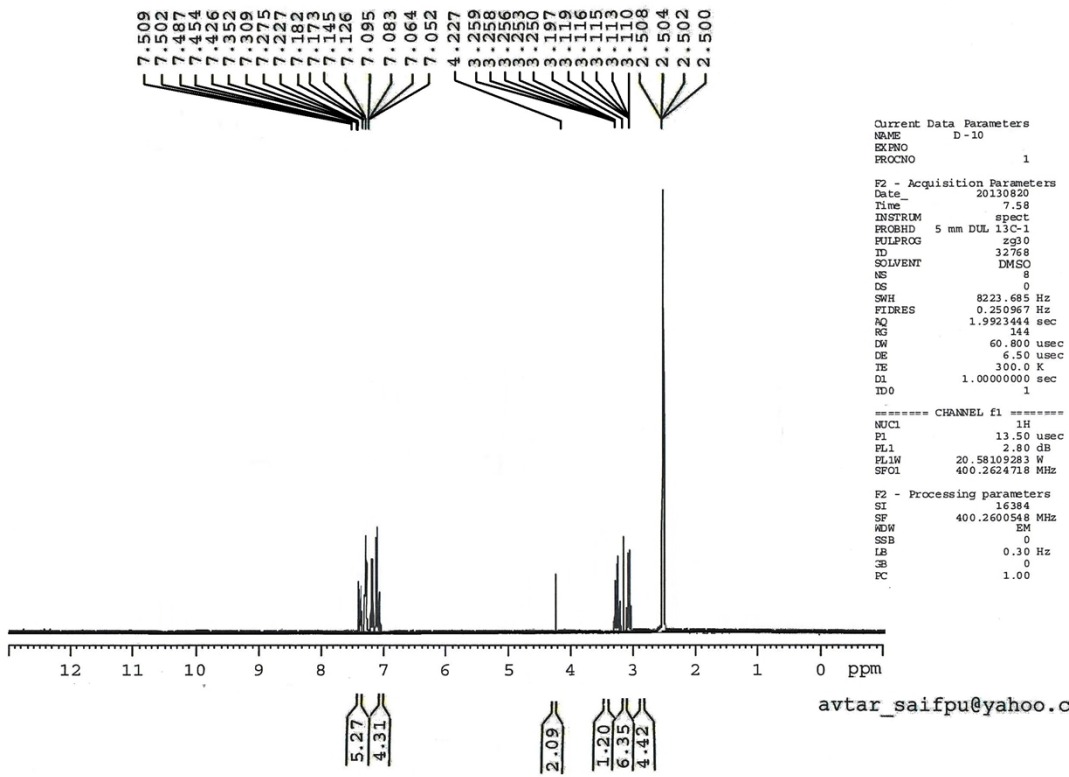

avtar\_saifpu@yahoo.co.in

<sup>1</sup>H NMR spectrum of compound (4j)



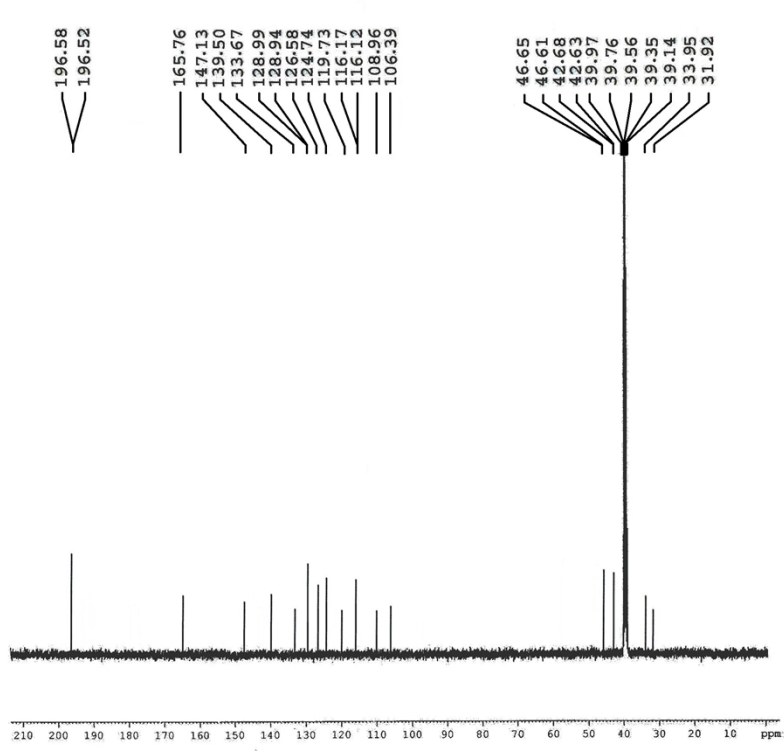

BRUKER  
 AVANCE II 00 NMR  
 Spectrometer  
 SAIF  
 Panjab University  
 Chandigarh

```

Current Data Parameters
NAME      D-10
EXPNO     1
PROCNO    1

F2 - Acquisition Parameters
Date_     20130820
Time      8.14
INSTRUM   spect
PROBHD    5 mm PABBO BB-
PULPROG   zgpg30
TD         65536
SOLVENT   DMSO
NS         400
DS         4
SWH        29761.904 Hz
FIDRES     0.454151 Hz
AQ         1.1010548 sec
RG         575
DW         16.800 usec
DE         6.00 usec
TE         296.3 K
D1         2.00000000 sec
d11        0.03000000 sec
DELTA     1.89999998 sec
TD0        1

===== CHANNEL f1 =====
NUC1       13C
P1         9.60 usec
PL1        -2.00 dB
SFO1       100.6228298 MHz

===== CHANNEL f2 =====
CPDPRG2    waltz16
NUC2       1H
PCPD2      90.00 usec
PL2         -3.00 dB
PL12       14.31 dB
PL13       18.00 dB
SFO2       400.1316005 MHz

F2 - Processing parameters
SI         32768
SF         100.6128193 MHz
WDW        EM
SSB        0
LB         1.00 Hz
GB         0
PC         1.40
  
```

avtar\_saipu@yahoo.co.in

<sup>13</sup>C NMR spectrum of compound (4j)

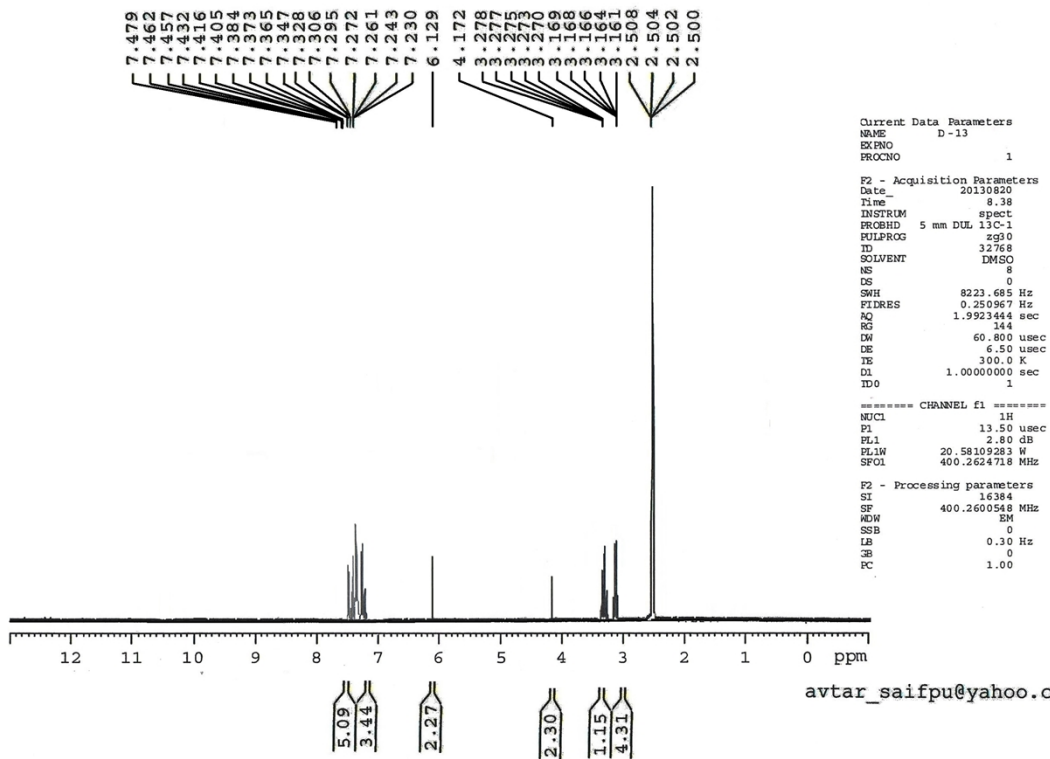

<sup>1</sup>H NMR spectrum of compound (4m)

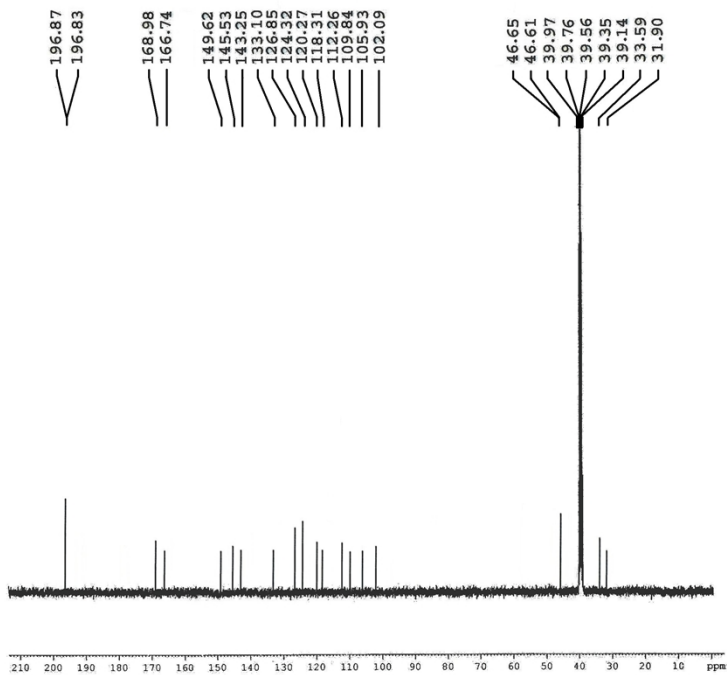

```

BRUKER
AVANCE II 00 NMR
Spectrometer
SAIF
Panjab University
Chandigarh

Current Data Parameters
NAME      D-13
EXPNO     1
PROCNO    1

F2 - Acquisition Parameters
Date_     20130820
Time      8.54
INSTRUM   spect
PROBHD    5 mm PABBO BB-
PULPROG   zgpg30
TD         65536
SOLVENT   DMSO
NS         400
DS         4
SWH        29761.904 Hz
FIDRES     0.454131 Hz
AQ          1.1010548 sec
RG          575
EW          16.800 usec
DE           6.00 usec
TE          296.3 K
d1          2.0000000 sec
d11         0.0300000 sec
DELTA      1.89999998 sec
TD0         1

===== CHANNEL f1 =====
NUC1       13C
P1          9.60 usec
PL1         -2.00 dB
SFO1       100.6228298 MHz

===== CHANNEL f2 =====
CPDPRG2    waltz16
NUC2        1H
PCPD2       80.00 usec
PL2         -3.00 dB
PL12        14.31 dB
PL13        18.00 dB
SFO2       400.1316005 MHz

F2 - Processing parameters
SI          32768
SF          100.6128193 MHz
WDW         EM
SSB         0
LB          1.00 Hz
GB          0
PC          1.40
avtar_saifpu@yahoo.co.in

```

$^{13}\text{C}$  NMR spectrum of compound (4m)

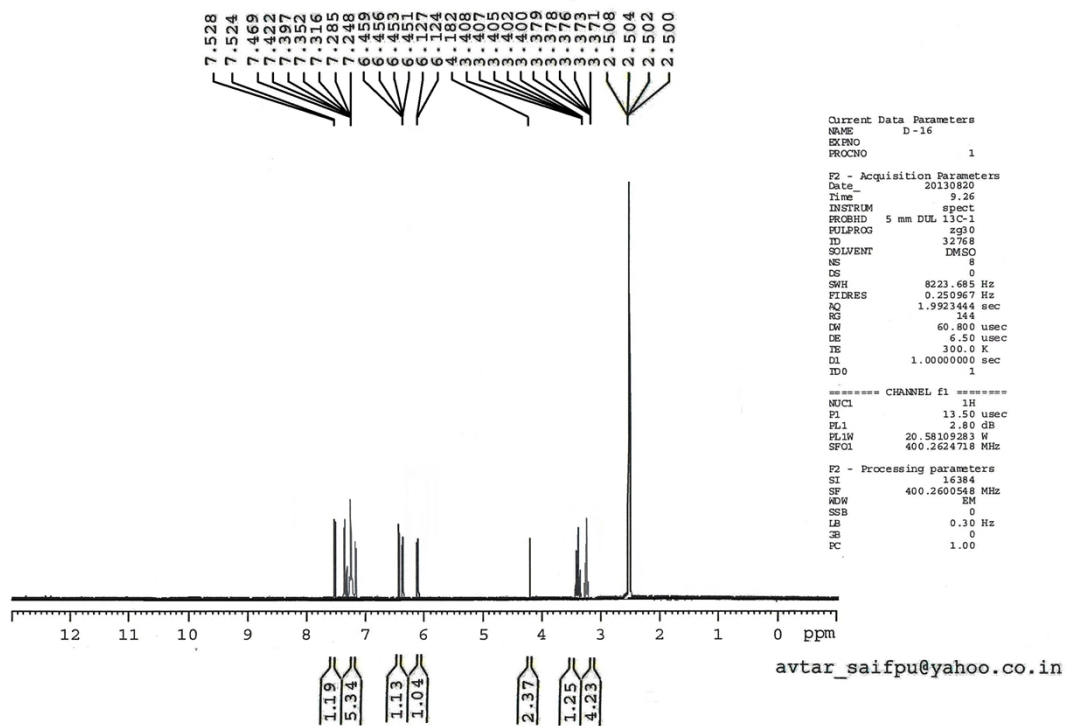

<sup>1</sup>H NMR spectrum of compound (4p)

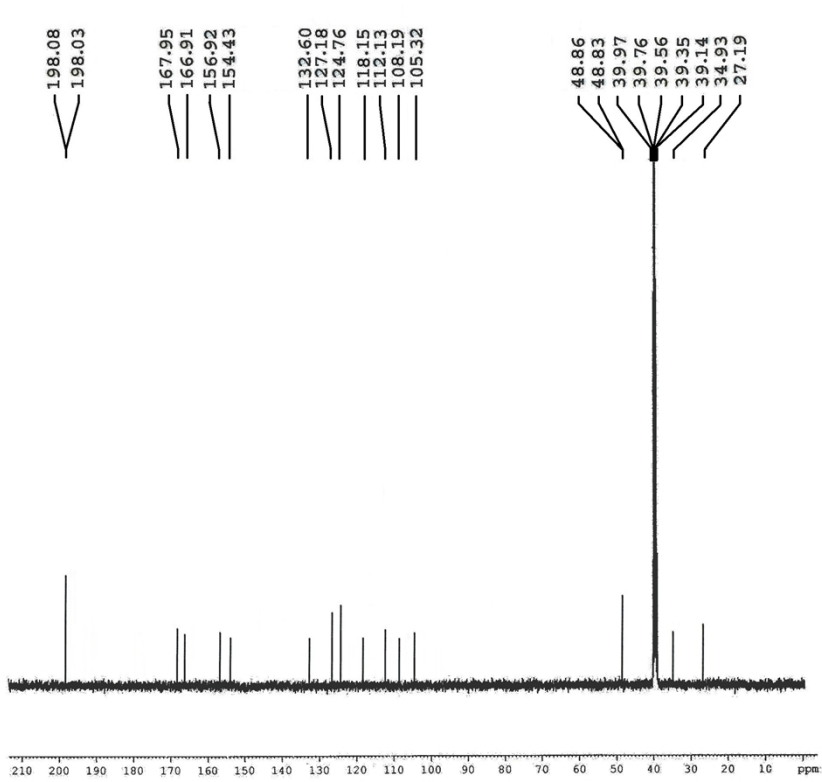

BRUKER  
 AVANCE II 00 NMR  
 Spectrometer  
 SAIF  
 Panjab University  
 Chandigarh

Current Data Parameters  
 NAME D-16  
 EXPNO 1  
 PROCNO 1

F2 - Acquisition Parameters  
 Date\_ 20130820  
 Time 9.53  
 INSTRUM spect  
 PROBHD 5 mm PABBO BB-  
 PULPROG zgpg30  
 TD 65536  
 SOLVENT DMSO  
 NS 400  
 DS 4  
 SWH 29761.904 Hz  
 FIDRES 0.454131 Hz  
 AQ 1.1010348 sec  
 RG 575  
 DW 16.800 usec  
 DE 6.00 usec  
 TE 296.3 K  
 D1 2.0000000 sec  
 d11 0.0300000 sec  
 DELTA 1.89999998 sec  
 TDO 1

----- CHANNEL f1 -----  
 NUC1 13C  
 P1 9.60 usec  
 PL1 -2.00 dB  
 SFO1 100.6228298 MHz

----- CHANNEL f2 -----  
 CPDPRG2 waltz16  
 NUC2 1H  
 PCPD2 80.00 usec  
 PL2 -3.00 dB  
 PL12 14.31 dB  
 PL13 18.00 dB  
 SFO2 400.1316005 MHz

F2 - Processing parameters  
 SI 32768  
 SF 100.6128193 MHz  
 WDW EM  
 SSB 0  
 LB 1.00 Hz  
 GB 0  
 PC 1.40

avtar\_saifpu@yahoo.co.in

<sup>13</sup>C NMR spectrum of compound (4p)

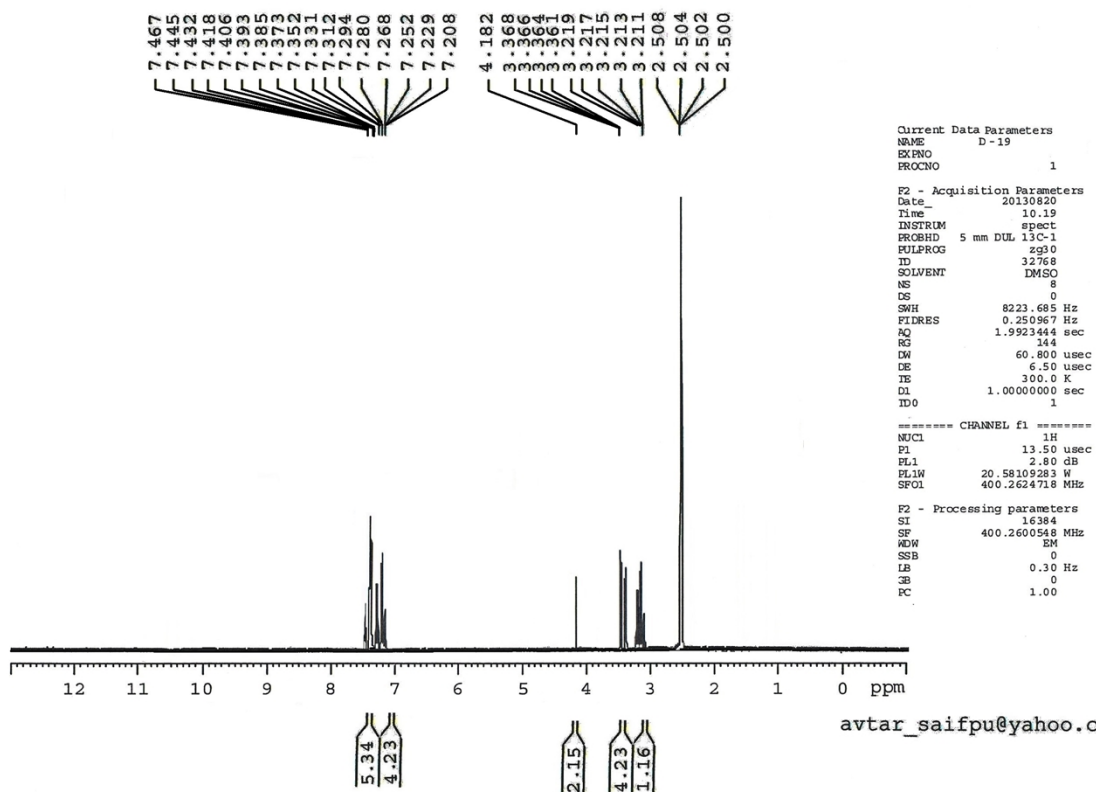

avtar\_saifpu@yahoo.co.in

<sup>1</sup>H NMR spectrum of compound (4s)

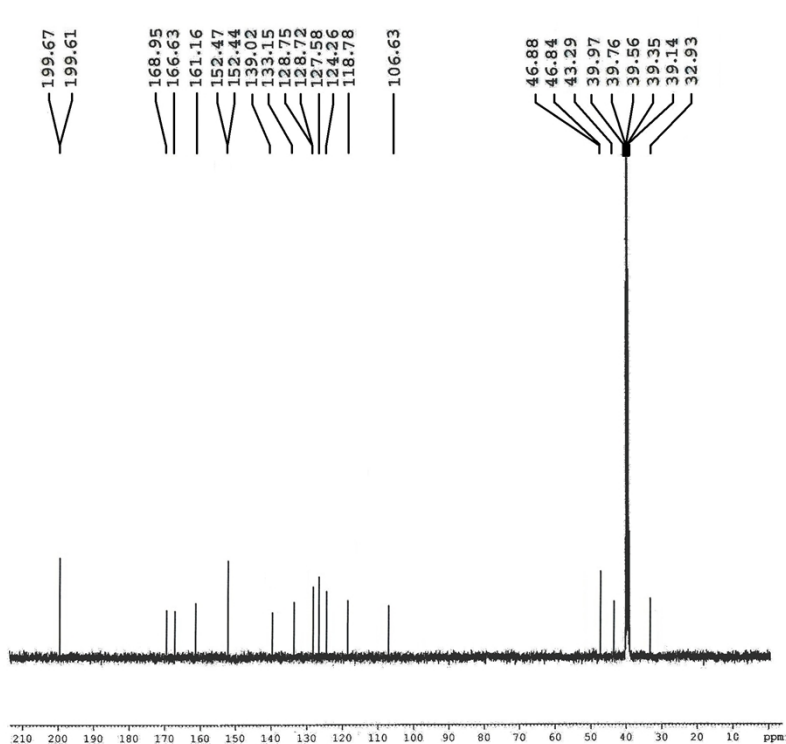

BRUKER  
 AVANCE II 00 NMR  
 Spectrometer  
 SAIF  
 Panjab University  
 Chandigarh

Current Data Parameters  
 NAME D-19  
 EXPNO 1  
 PROCNO 1  
 F2 - Acquisition Parameters  
 Date\_ 20130820  
 Time\_ 10.47  
 INSTRUM spect  
 FROBHD 5 mm PABBO ES-  
 PULPROG zgpg30  
 TD 65536  
 SOLVENT DMSO  
 NS 400  
 DS 4  
 SWH 29761.904 Hz  
 FIDRES 0.454131 Hz  
 AQ 1.1010548 sec  
 RG 275  
 DW 16.800 usec  
 DE 6.00 usec  
 TE 296.3 K  
 D1 2.0000000 sec  
 d11 0.0300000 sec  
 DELTA 1.89999998 sec  
 TDO 1

===== CHANNEL f1 =====  
 NUC1 <sup>13</sup>C  
 P1 9.60 usec  
 PL1 -2.00 dB  
 SFO1 100.6228298 MHz

===== CHANNEL f2 =====  
 CPDPRG2 waltz16  
 NUC2 <sup>1</sup>H  
 PCPD2 80.00 usec  
 PL2 -3.00 dB  
 PL12 14.31 dB  
 PL13 18.00 dB  
 SFO2 400.1316005 MHz

F2 - Processing parameters  
 SI 32768  
 SF 100.6128193 MHz  
 NDW EM  
 SSB 0  
 LB 1.00 Hz  
 GB 0  
 PC 1.40

avtar\_saifpu@yahoo.co.in

<sup>13</sup>C NMR spectrum of compound (4s)

**Table S1** Crystal and structure refinement data for intermediate compound **(5)**

| Compound                                                 | (5)                                               |
|----------------------------------------------------------|---------------------------------------------------|
| Empirical formula                                        | C <sub>15</sub> H <sub>17</sub> NO <sub>2</sub> S |
| Formula wt.                                              | 274.35                                            |
| Crystal system                                           | Triclinic                                         |
| Space group                                              | <i>P</i> -1                                       |
| <i>a</i> , Å                                             | 7.298(5)                                          |
| <i>b</i> , Å                                             | 9.090(3)                                          |
| <i>c</i> , Å                                             | 10.762(5)                                         |
| $\alpha$ (°)                                             | 75.500                                            |
| $\beta$ (°)                                              | 78.979(5)                                         |
| $\gamma$ (°)                                             | 89.218(5)                                         |
| <i>U</i> , Å <sup>3</sup>                                | 678.0(7)                                          |
| <i>Z</i>                                                 | 2                                                 |
| $\rho_{\text{calc}}$ Mg/m <sup>3</sup>                   | 1.349                                             |
| $\mu$ , mm <sup>-1</sup>                                 | 0.236                                             |
| <i>F</i> (000)                                           | 292                                               |
| Refl. collected                                          | 3515                                              |
| Independent refl.                                        | 2240                                              |
| GooF                                                     | 1.166                                             |
| Final R indices<br>[ <i>I</i> > 2 $\sigma$ ( <i>I</i> )] | <i>R</i> 1 = 0.0543<br>w <i>R</i> 2 = 0.1554      |
| <i>R</i> indices<br>(all data)                           | <i>R</i> 1 = 0.0626<br>w <i>R</i> 2 = 0.1974      |

$$R_1 = \frac{\sum ||F_o| - |F_c||}{\sum |F_o|} \text{ with } F_o^2 > 2\sigma(F_o^2). \quad wR_2 = [\frac{\sum w(|F_o^2| - |F_c^2|)^2}{\sum |F_o^2|^2}]^{1/2}$$
